# Supplementary material for: The Effect of Prenatal and Neonatal Fluoride Exposure to Morphine-Induced Neuroinflammation
Source: MDPI journal article supplement (doi:10.3390/ijms25020826), 2024-01-09
Supplement: s1 [file s1]

# Supplementary Materials

**Table S1:** Mean and SD values of the mRNA expression of COX-1, COX-2, Iba1 and GFAP in prefrontal cortex (PFC), striatum, hippocampus and cerebellum of each studied group.

|       |             | Control (C)   | Fluoride (F)  | Morphine (M)  | Fluoride+Morphine (MF) |
|-------|-------------|---------------|---------------|---------------|------------------------|
| COX-1 | PFC         | 0.0090±0.0026 | 0.0083±0.0025 | 0.0115±0.0005 | 0.0120±0.0014          |
|       | Striatum    | 0.0082±0.0017 | 0.0067±0.0016 | 0.0104±0.0010 | 0.0097±0.0016          |
|       | Hippocampus | 0.0075±0.0017 | 0.0082±0.0013 | 0.0112±0.0007 | 0.0114±0.0020          |
|       | Cerebellum  | 0.0095±0.0018 | 0.0045±0.0017 | 0.0069±0.0017 | 0.0066±0.0025          |
| COX-2 | PFC         | 0.0080±0.0021 | 0.0010±0.0015 | 0.0091±0.0008 | 0.0010±0.0007          |
|       | Striatum    | 0.0068±0.0019 | 0.0105±0.0009 | 0.0090±0.0011 | 0.0079±0.0009          |
|       | Hippocampus | 0.0059±0.0016 | 0.0087±0.0009 | 0.0085±0.0004 | 0.0087±0.0009          |
|       | Cerebellum  | 0.0078±0.0016 | 0.0104±0.0032 | 0.0061±0.0014 | 0.0061±0.0019          |
| Iba1  | PFC         | 0.0065±0.0018 | 0.0083±0.0025 | 0.0096±0.0013 | 0.0071±0.0013          |
|       | Striatum    | 0.0076±0.0011 | 0.0050±0.0022 | 0.0077±0.0007 | 0.0078±0.0016          |
|       | Hippocampus | 0.0078±0.0011 | 0.0070±0.0013 | 0.0080±0.0008 | 0.0083±0.0012          |
|       | Cerebellum  | 0.0104±0.0013 | 0.0103±0.0024 | 0.0103±0.0015 | 0.0112±0.0018          |
| GFAP  | PFC         | 0.0023±0.0019 | 0.0058±0.0013 | 0.0051±0.0008 | 0.0077±0.0020          |
|       | Striatum    | 0.0035±0.0008 | 0.0080±0.0070 | 0.0039±0.0014 | 0.0033±0.0008          |
|       | Hippocampus | 0.0031±0.0010 | 0.0010±0.0061 | 0.0034±0.0010 | 0.0036±0.0013          |
|       | Cerebellum  | 0.0038±0.0013 | 0.0074±0.0038 | 0.0040±0.0013 | 0.0061±0.0023          |

**Table S2:** Mean and SD values of the protein expression of COX-1, COX-2, Iba1 and GFAP in Prefrontal cortex (PFC), striatum, hippocampus and cerebellum of each studied group.

|       |             | Control (C) | Fluoride (F) | Morphine (M) | Fluoride+Morphine (MF) |
|-------|-------------|-------------|--------------|--------------|------------------------|
| COX-1 | PFC         | 1.00±0.00   | 1.03±0.10    | 1.20±0.18    | 1.23±0.16              |
|       | Striatum    | 1.00±0.00   | 2.00±0.51    | 0.83±0.19    | 1.82±0.46              |
|       | Hippocampus | 1.00±0.00   | 1.21±0.31    | 0.94±0.17    | 1.04±0.12              |
|       | Cerebellum  | 1.00±0.00   | 0.90±0.34    | 2.03±0.41    | 1.98±0.21              |
| COX-2 | PFC         | 1.00±0.00   | 0.82±0.21    | 1.1±0.11     | 1.08±0.28              |
|       | Striatum    | 1.00±0.00   | 2.50±0.31    | 2.00±0.28    | 1.40±0.51              |
|       | Hippocampus | 1.00±0.00   | 1.10±0.15    | 0.98±0.19    | 0.86±0.38              |
|       | Cerebellum  | 1.00±0.00   | 1.51±0.31    | 1.32±0.19    | 1.91±0.29              |
| Iba1  | PFC         | 1.00±0.00   | 0.90±0.09    | 0.80±0.11    | 0.70±0.08              |
|       | Striatum    | 1.00±0.00   | 1.50±0.22    | 1.18±0.10    | 1.21±0.12              |
|       | Hippocampus | 1.00±0.00   | 1.23±0.11    | 1.35±0.13    | 1.01±0.39              |
|       | Cerebellum  | 1.00±0.00   | 1.01±0.19    | 0.80±0.21    | 1.01±0.10              |
| GFAP  | PFC         | 1.00±0.00   | 1.25±0.13    | 2.78±0.31    | 2.69±0.29              |
|       | Striatum    | 1.00±0.00   | 1.32±0.23    | 1.41±0.15    | 1.43±0.17              |
|       | Hippocampus | 1.00±0.00   | 1.03±0.10    | 1.53±0.21    | 1.48±0.12              |
|       | Cerebellum  | 1.00±0.00   | 1.63±0.21    | 1.67±0.31    | 1.73±0.28              |
